# Supplementary material for: Wine Storage at Cellar vs. Room Conditions: Changes in the Aroma Composition of Riesling Wine
Source: MDPI journal article supplement (doi:10.3390/molecules26206256), 2021-10-16

**Supplementary Table S1.** Basic wine parameters in the initial wine and in the wine samples after 6, 12 and 24 months of storage

| Parameter <sup>1</sup> | Units | Analysis<br>after bottling | Analysis after storage time <sup>2,3,4</sup> |            |                 |            |                 |            |
|------------------------|-------|----------------------------|----------------------------------------------|------------|-----------------|------------|-----------------|------------|
|                        |       |                            | 6 months                                     |            | 12 months       |            | 24 months       |            |
|                        |       |                            | Cool                                         | Warm       | Cool            | Warm       | Cool            | Warm       |
| Density                | 20/20 | 0.9956 ± 0.0002            | 0.9957 ± 3*10 <sup>-16</sup>                 |            | 0.9955 ± 0.0004 |            | 0.9956 ± 0.0003 |            |
| Alcohol                | g/L   | 98.4 ± 1.1                 | 97.9 ± 0.9                                   |            | 98.7 ± 1.0      |            | 97.8 ± 0.9      |            |
| Glycerol               | g/L   | 5.6 ± 0.1                  | 5.6 ± 0.1                                    |            | 5.7 ± 0.1       |            | 5.6 ± 0.1       |            |
| Extract                | g/L   | 28.7 ± 0.1                 | 27.8 ± 0.1                                   | 29.3 ± 0.2 | 28.3 ± 0.2      | 30.1 ± 0.3 | 29.5 ± 0.3      | 31.2 ± 0.4 |
| Sugar-free Extract     | g/L   | 21.6 ± 0.2                 | 20.7 ± 0.2                                   | 22.3 ± 0.2 | 21.1 ± 0.2      | 22.9 ± 0.2 | 22.3 ± 0.3      | 24.1 ± 0.4 |
| Fermentable Sugars     | g/L   | 7.1 ± 0.1                  | 7.1 ± 0.1                                    |            | 7.2 ± 0.1       |            | 7.1 ± 0.1       |            |
| Glucose                | g/L   | 3.3 ± 0.1                  | 3.2 ± 0.1                                    |            | 3.4 ± 0.1       |            | 3.5 ± 0.1       |            |
| Fructose               | g/L   | 3.8 ± 0.1                  | 3.8 ± 0.1                                    |            | 3.8 ± 0.1       |            | 3.7 ± 0.1       |            |
| pH                     |       | 3.5 ± 0                    | 3.5 ± 0                                      |            | 3.4 ± 0         |            | 3.4 ± 0.1       |            |
| Total acidity          | g/L   | 7.2 ± 0.1                  | 6.9 ± 0.1                                    | 7.3 ± 0.1  | 6.9 ± 0.1       | 7.4 ± 0.1  | 6.9 ± 0.1       | 7.3 ± 0.1  |
| Tartaric acid          | g/L   | 2.6 ± 0.1                  | 2.2 ± 0.1                                    | 2.7 ± 0.1  | 2.1 ± 0.0       | 2.7 ± 0.0  | 1.9 ± 0.1       | 2.5 ± 0.1  |
| Malic acid             | g/L   | 4.1 ± 0                    | 4.0 ± 0.1                                    |            | 4.1 ± 0.1       |            | 4.1 ± 0.1       |            |
| Lactic Acid            | g/L   | 0.4 ± 0.1                  | 0.4 ± 0.1                                    |            | 0.4 ± 0.1       |            | 0.4 ± 0.1       |            |
| Volatile acidity       | g/L   | 0.6 ± 0                    | 0.6 ± 0                                      |            | 0.6 ± 0         |            | 0.6 ± 0.1       |            |
| Acetaldehyde           | mg/L  | na                         | 24.5 ± 0.5                                   | 25.7 ± 1.6 | 23.7 ± 0.6      | 24.3 ± 0.7 | 24.3 ± 0.6      | 24.9 ± 0.5 |

<sup>1</sup> All the parameters were measured by FTIR analysis, except the acetaldehyde content, which was measured by the enzymatic method

<sup>2</sup> Values on the blue background: mean of all wine samples' variants stored at Cool conditions ± standard deviation

<sup>3</sup> Values on the yellow background: mean of all wine samples' variants stored at Warm conditions ± standard deviation

<sup>4</sup> Values on the white background: mean of all wine samples' variants stored at Cool and Warm conditions ± standard deviation

**Supplementary Table S2.** Concentration of the secondary wine aroma in the initial wine and after 24 months of storage

| Group aromas    | Aroma compound                         | Initial wines <sup>1</sup> | Wines after 24 months of storage <sup>2</sup> |            |                                           |            |                                             |            |                                          |            |
|-----------------|----------------------------------------|----------------------------|-----------------------------------------------|------------|-------------------------------------------|------------|---------------------------------------------|------------|------------------------------------------|------------|
|                 |                                        |                            | <i>High SO<sub>2</sub>/no CO<sub>2</sub></i>  |            | <i>High SO<sub>2</sub>/CO<sub>2</sub></i> |            | <i>Medium SO<sub>2</sub>/CO<sub>2</sub></i> |            | <i>Low SO<sub>2</sub>/CO<sub>2</sub></i> |            |
|                 |                                        |                            | Cool                                          | Warm       | Cool                                      | Warm       | Cool                                        | Warm       | Cool                                     | Warm       |
| Acetate esters  | Isoamyl acetate, µg/L                  | 3528 ± 319                 | 983 ± 42                                      | 142 ± 12   | 873 ± 13                                  | 131 ± 9    | 1037 ± 80                                   | 146 ± 15   | 979 ± 39                                 | 134 ± 10   |
|                 | 2-Methylbutyl acetate, µg/L            | 166 ± 17                   | 49 ± 3                                        | 21 ± 1     | 44 ± 0                                    | 20 ± 1     | 51 ± 5                                      | 20 ± 1     | 50 ± 2                                   | 20 ± 0     |
|                 | Hexyl acetate, µg/L                    | 221 ± 25                   | 35 ± 6                                        | nq         | 32 ± 3                                    | nq         | 38 ± 7                                      | nq         | 37 ± 5                                   | nq         |
|                 | 2-Phenylethyl acetate, µg/L            | 299 ± 9                    | 87 ± 11                                       | 25 ± 0     | 78 ± 2                                    | 24 ± 1     | 86 ± 6                                      | 25 ± 1     | 95 ± 6                                   | 24 ± 1     |
| Ethyl esters    | Ethyl acetate, mg/L                    | 117 ± 5                    | 104 ± 3                                       | 102 ± 6    | 94 ± 1                                    | 101 ± 4    | 102 ± 7                                     | 105 ± 5    | 98 ± 3                                   | 98 ± 4     |
|                 | Ethyl propionate, µg/L                 | 179 ± 17                   | 381 ± 28                                      | 395 ± 22   | 343 ± 10                                  | 380 ± 18   | 388 ± 27                                    | 397 ± 9    | 384 ± 15                                 | 378 ± 14   |
|                 | Ethyl butanoate, µg/L                  | 695 ± 68                   | 626 ± 16                                      | 598 ± 29   | 566 ± 19                                  | 578 ± 16   | 655 ± 41                                    | 599 ± 13   | 627 ± 24                                 | 565 ± 22   |
|                 | Ethyl hexanoate, µg/L                  | 1076 ± 163                 | 1284 ± 120                                    | 1322 ± 79  | 1195 ± 43                                 | 1384 ± 40  | 1169 ± 22                                   | 1380 ± 36  | 1066 ± 74                                | 1273 ± 62  |
|                 | Ethyl octanoate, µg/L                  | 1468 ± 160                 | 1084 ± 224                                    | 1084 ± 111 | 1054 ± 114                                | 1271 ± 5   | 910 ± 22                                    | 1207 ± 44  | 815 ± 152                                | 1054 ± 81  |
|                 | Ethyl decanoate, µg/L                  | 515 ± 50                   | 272 ± 71                                      | 188 ± 68   | 298 ± 72                                  | 255 ± 70   | 270 ± 53                                    | 232 ± 74   | 221 ± 41                                 | 186 ± 57   |
|                 | Ethyl 2-methylpropanoate, µg/L         | 80 ± 11                    | 156 ± 4                                       | 191 ± 13   | 150 ± 3                                   | 187 ± 4    | 169 ± 10                                    | 194 ± 4    | 160 ± 6                                  | 184 ± 8    |
|                 | Ethyl 2-methylbutyrate, µg/L           | na                         | 25 ± 2                                        | 41 ± 2     | 24 ± 1                                    | 40 ± 1     | 28 ± 2                                      | 40 ± 1     | 26 ± 1                                   | 40 ± 1     |
|                 | Ethyl 2-hydroxy-4-methylvalerate, µg/L | nq                         | 132 ± 13                                      | 130 ± 2    | 125 ± 4                                   | 125 ± 7    | 139 ± 1                                     | 128 ± 5    | 144 ± 17                                 | 122 ± 2    |
|                 | Ethyl phenylacetate, µg/L              | nq                         | 12 ± 1                                        | 13 ± 0     | 11 ± 0                                    | 12 ± 0     | 12 ± 1                                      | 13 ± 0     | 12 ± 1                                   | 13 ± 0     |
|                 | Ethyl lactate, mg/L                    | 29 ± 1                     | 54 ± 5                                        | 52 ± 1     | 53 ± 1                                    | 49 ± 6     | 57 ± 3                                      | 49 ± 2     | 54 ± 3                                   | 45 ± 1     |
|                 | Diethyl succinate, µg/L                | 1096 ± 18                  | 4118 ± 130                                    | 6998 ± 153 | 3954 ± 75                                 | 6831 ± 83  | 4161 ± 114                                  | 7017 ± 92  | 4072 ± 264                               | 6438 ± 119 |
| Higher alcohols | <i>i</i> -Butanol, mg/L                | 33 ± 2                     | 30 ± 3                                        | 32 ± 1     | 28 ± 1                                    | 30 ± 2     | 30 ± 2                                      | 30 ± 1     | 30 ± 0                                   | 30 ± 2     |
|                 | Isoamyl alcohol, mg/L                  | 162 ± 8                    | 152 ± 11                                      | 162 ± 6    | 141 ± 8                                   | 161 ± 6    | 138 ± 6                                     | 161 ± 5    | 131 ± 9                                  | 152 ± 6    |
|                 | 2-Methyl-1-butanol, mg/L               | 30 ± 2                     | 31 ± 1                                        | 31 ± 1     | 28 ± 1                                    | 30 ± 2     | 29 ± 2                                      | 30 ± 1     | 29 ± 1                                   | 30 ± 1     |
|                 | Hexanol, µg/L                          | 1152 ± 44                  | 1672 ± 117                                    | 1567 ± 59  | 1512 ± 45                                 | 1456 ± 71  | 1664 ± 120                                  | 1534 ± 40  | 1713 ± 85                                | 1497 ± 34  |
|                 | 2-Phenylethanol, mg/L                  | 19 ± 0                     | 24 ± 0                                        | 24 ± 1     | 22 ± 0                                    | 23 ± 1     | 23 ± 1                                      | 24 ± 0     | 24 ± 0                                   | 23 ± 0     |
| Fatty acids     | <i>i</i> -Valeric acid, µg/L           | 1717 ± 25                  | 1237 ± 117                                    | 1102 ± 22  | 1338 ± 22                                 | 1053 ± 29  | 1378 ± 40                                   | 1104 ± 21  | 1390 ± 107                               | 1085 ± 10  |
|                 | Hexanoic acid, mg/L                    | 12 ± 0                     | 8 ± 1                                         | 8 ± 0      | 8 ± 0                                     | 7 ± 0      | 9 ± 0                                       | 7 ± 0      | 9 ± 1                                    | 7 ± 0      |
|                 | Octanoic acid, mg/L                    | 10 ± 0                     | 8 ± 1                                         | 7 ± 0      | 7 ± 0                                     | 6 ± 0      | 8 ± 1                                       | 7 ± 1      | 8 ± 1                                    | 7 ± 1      |
|                 | Decanoic acid, µg/L                    | 2390 ± 270                 | 1673 ± 439                                    | 1282 ± 81  | 1523 ± 156                                | 1275 ± 136 | 1778 ± 343                                  | 1305 ± 109 | 1870 ± 330                               | 1299 ± 118 |

<sup>1</sup> Mean of three Riesling wines after the adjustment of Free SO<sub>2</sub> level (*High SO<sub>2</sub>*, *Medium SO<sub>2</sub>*, *Low SO<sub>2</sub>*) ± standard deviation

<sup>2</sup> Mean of three samples with *Diam 5*, *Diam 30* and *Diam 30 origin* stoppers ± standard deviation

**Supplementary Figure S1A.** Extracted Ion Chromatogram: TDN and naphthalene-*d*<sub>8</sub> (internal standard)

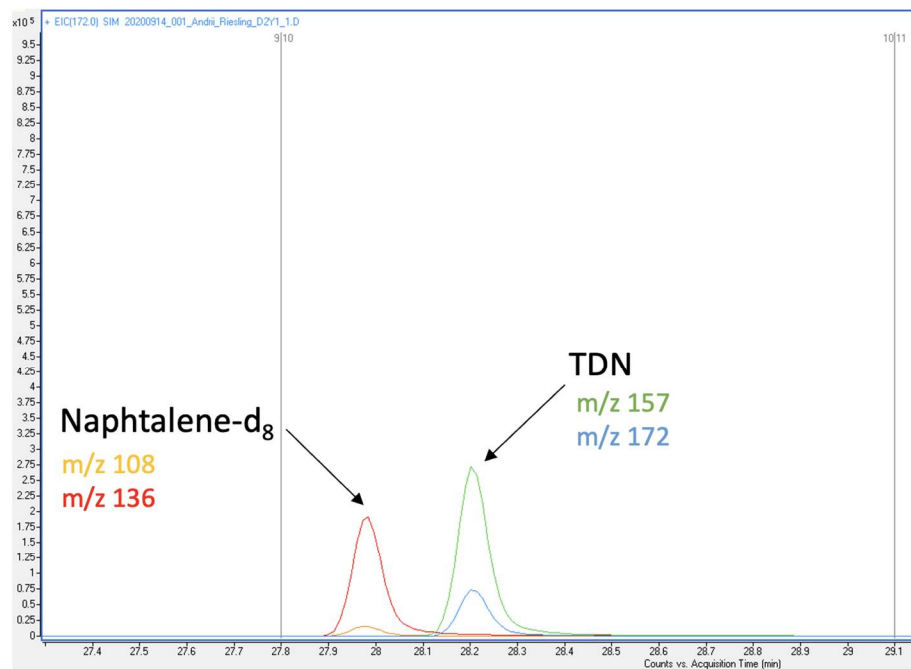

24 months: High SO<sub>2</sub>/CO<sub>2</sub>/Cool/Diam 5

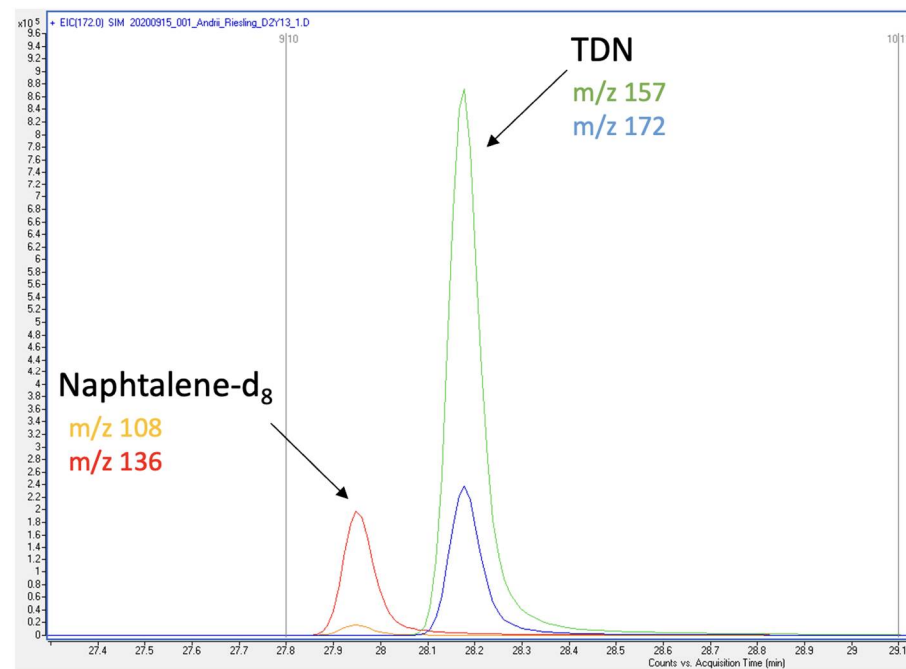

24 months: High SO<sub>2</sub>/CO<sub>2</sub>/Warm/Diam 5

**Supplementary Figure S1B.** Extracted Ion Chromatogram: linalool and linalool- $d_3$  (internal standard)

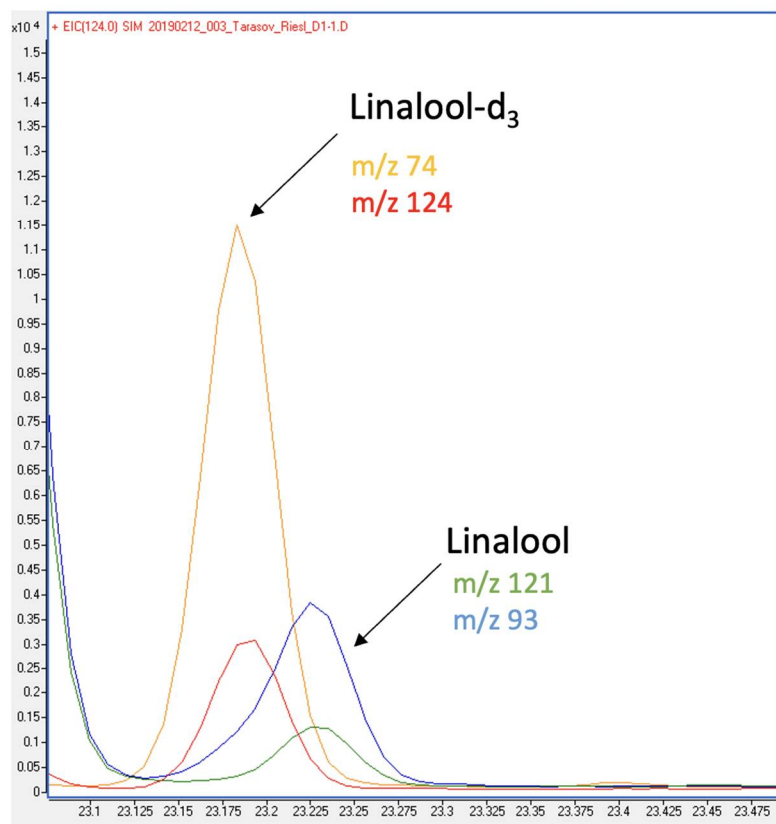

6 months: High  $\text{SO}_2/\text{CO}_2$ /Warm/Diam 5

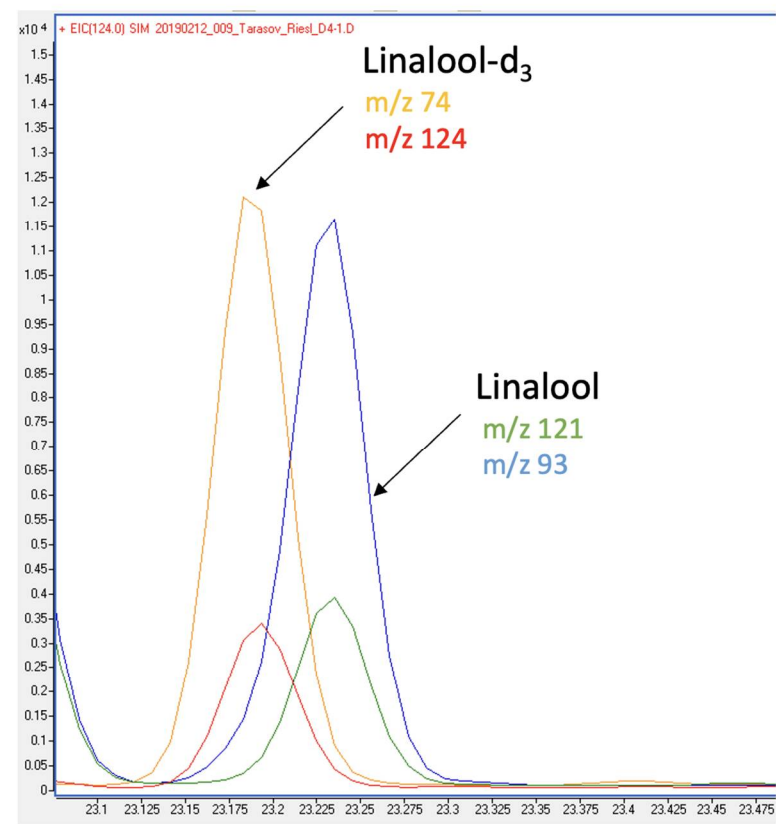

6 months: High  $\text{SO}_2/\text{CO}_2$ /Cool/Diam 5

**Supplementary Figure S2.** Loadings plot for the PCA analysis of the wines after 24 months of storage: SO<sub>2</sub> content, terpenes and C<sub>13</sub>-norisoprenoids (varietal aromas), LMWSCs

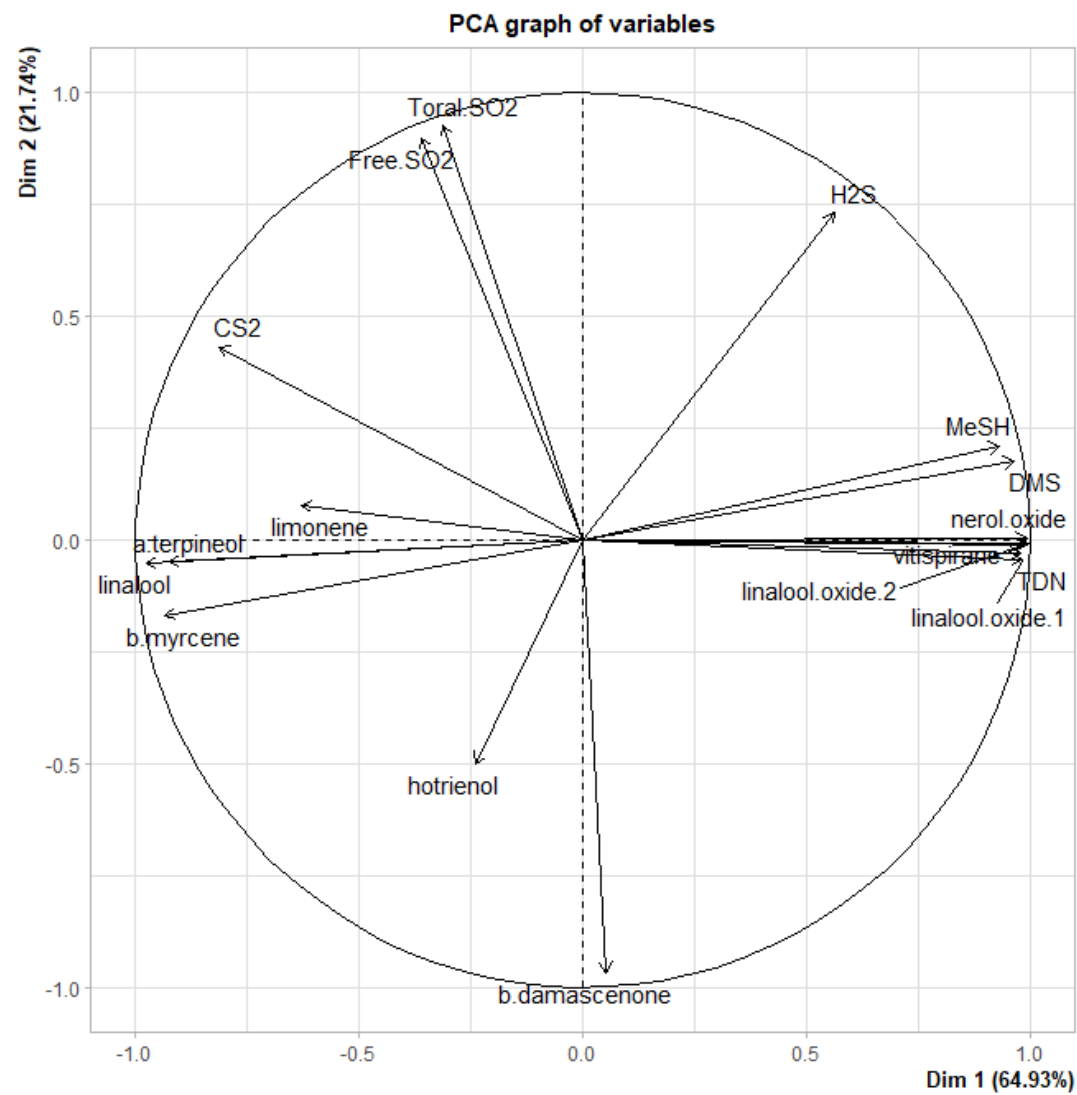

Supplement: s1 [file s1]
